# Supplementary material for: Opposing tumor-cell-intrinsic and -extrinsic roles of the IRF1 transcription factor in antitumor immunity
Source: PubMed Central journal article supplement — Cell Rep. Author manuscript; Available in PMC 2024 Aug 9. (PMC11315447; doi:10.1016/j.celrep.2024.114289), 2024-06-02
Supplement: NIHMS2005223-supplement-1.pdf [file NIHMS2005223-supplement-1.pdf]

**Cell Reports, Volume 43**

**Supplemental information**

**Opposing tumor-cell-intrinsic and -extrinsic  
roles of the IRF1 transcription factor  
in antitumor immunity**

**Prabhat K. Purbey, Joowon Seo, Manash K. Paul, Keisuke S. Iwamoto, Allison E. Daly, An-Chieh Feng, Ameya S. Champhekar, Justin Langerman, Katie M. Campbell, Dörthe Schae, William H. McBride, Steven M. Dubinett, Antoni Ribas, Stephen T. Smale, and Philip O. Scumpia**

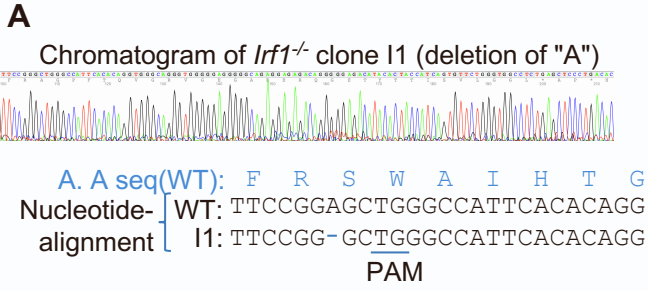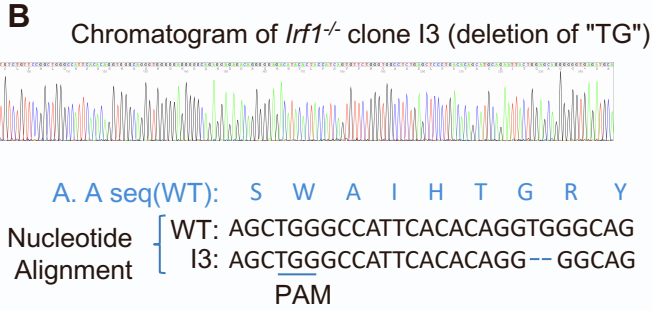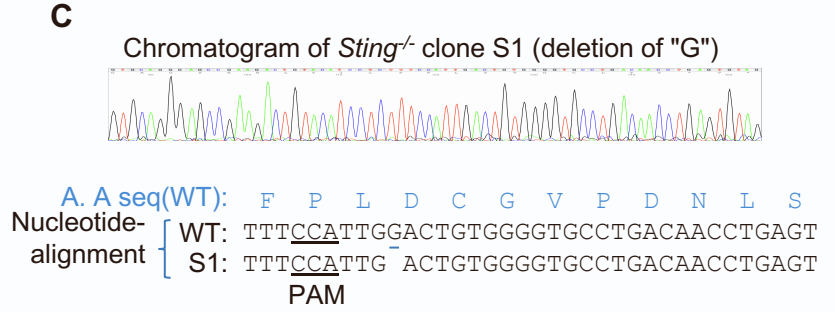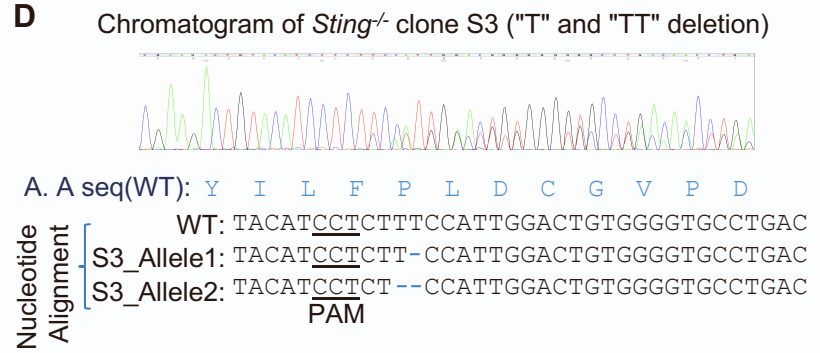

**E** MTS Assay to monitor proliferation of WT, *Sting*<sup>-/-</sup> and *Irf1*<sup>-/-</sup> clones

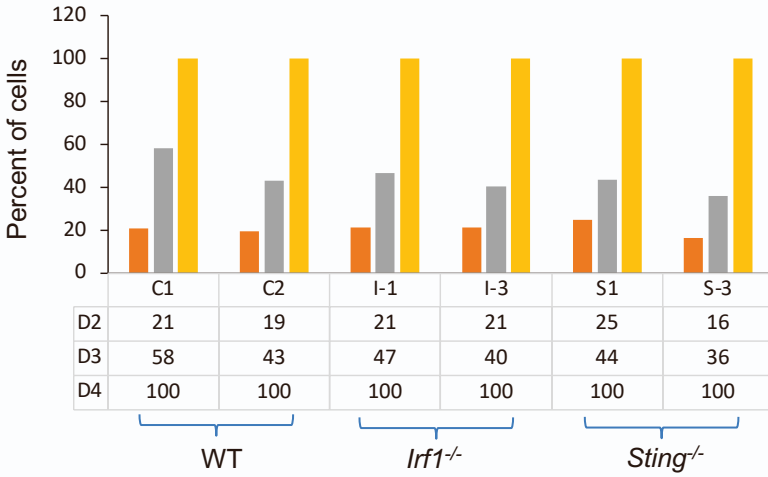

**F** MTS Assay to monitor radiation sensitivity of WT, *Sting*<sup>-/-</sup> and *Irf1*<sup>-/-</sup> clones

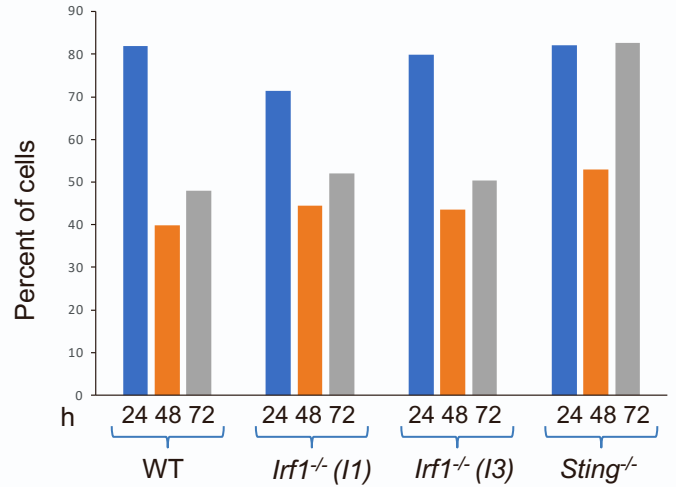

**G** Clonogenic Survival Assay of WT, *Sting*<sup>-/-</sup> and *Irf1*<sup>-/-</sup> clones

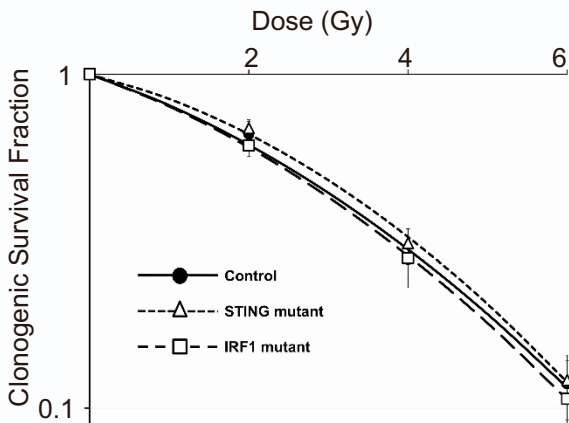

**H**

| Tumor Cell line | Immunogenicity | TMB | Basal MHC-I level |
|-----------------|----------------|-----|-------------------|
| MC38            | High           |     |                   |
| B16F10          |                |     |                   |
| YUMM2.1         | low            |     |                   |

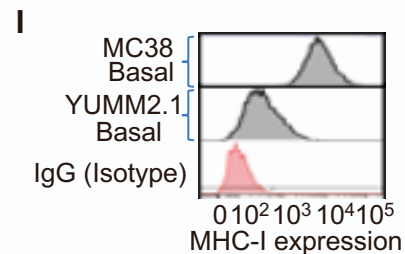

**Figure S1. (Related to Figure 1) Comparable Proliferation and Radiosensitivity of WT and Mutant MC38 Clones.** (A-B) Shows representative Sanger sequencing chromatogram and nucleotide alignment of IRF1 mutant MC38 clones (I1 and I3). Mutants created stop codons a few nucleotides after the mutation site that disrupts the DNA binding domain, and do not translate nuclear localization and transactivation domains of IRF1. (C-D) Shows representative Sanger sequencing chromatogram and nucleotide alignment of STING mutant MC38 clones (S1 and S3). These mutants created stop codons a few nucleotides after the mutation site that may produce truncated STING protein without the cyclic-di-GMP-binding and C terminal IRF3 activating domains. **(E)** MTS assay showing proliferation of 2 each of WT, *Irf1*<sup>-/-</sup> and *Sting*<sup>-/-</sup> clones upto day 4. **(F)** MTS assay to show radiosensitivity. Percent of surviving fractions are shown on the y axis after 24, 48 and 72h post 10Gy of x-ray exposure. **(G)** Clonogenic assay indicating comparable number of clones obtained in WT, *Irf1*<sup>-/-</sup> and *Sting*<sup>-/-</sup> on day 11 post 2, 4 and 6GY of IR. **(H)** Table representation of tumor mutation burden (TMB), immunogenicity and basal expression of MHC-I in mouse colon (MC38), and two types of melanomas (B16F10 and YUM2.1). **(I)** Shows low level surface expression of MHC-I in YUMM2.1 (middle histogram) as compared to MC38 (top histogram). The bottom histogram is the MC38 profile when stained with isotype control antibody.

*In vivo* Yumm2.1 tumor analysis

**A**

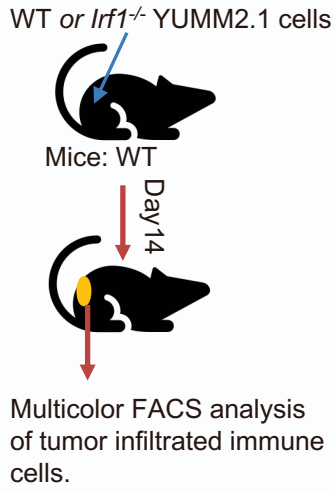

**B**

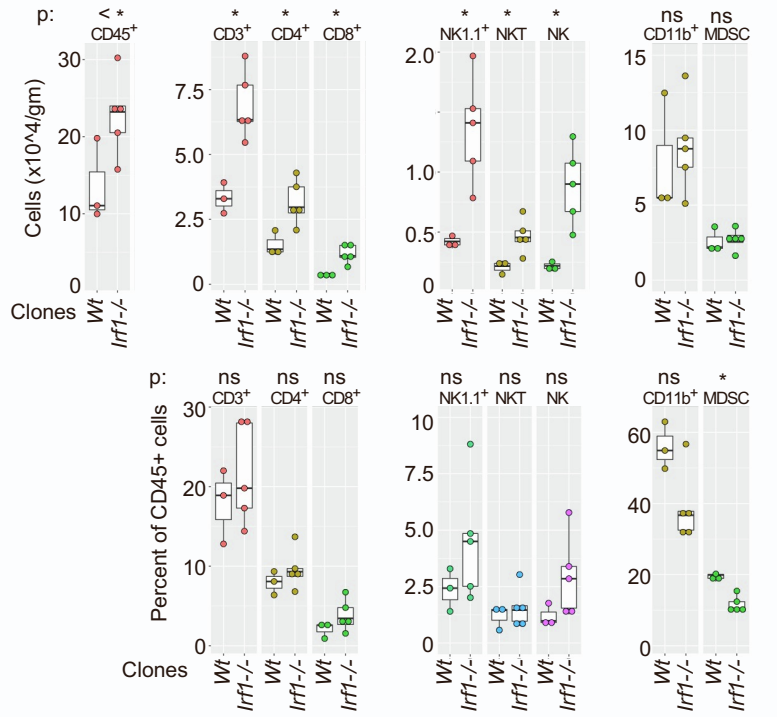

**C**

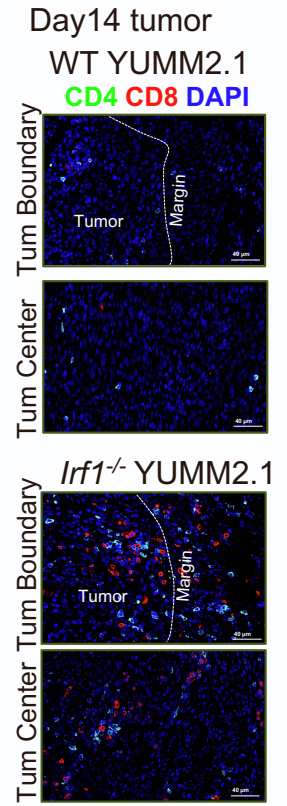

**D** *In vitro*: MHC-I expression

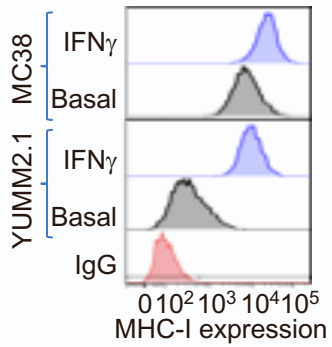

**E**

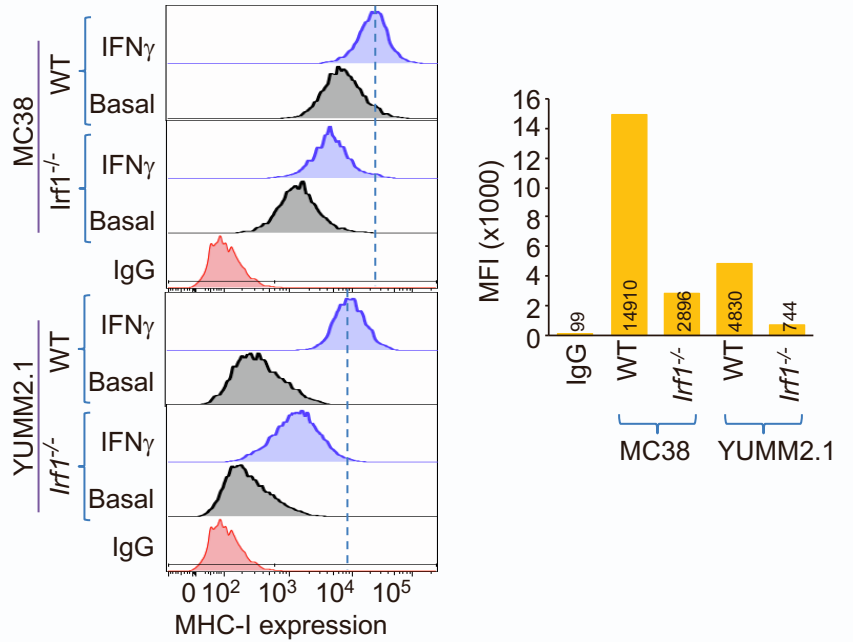

**Figure S2. Increased Infiltration of Innate Lymphoid Cells is Associated with Growth Impairment of Poorly Immunogenic *Irf1*<sup>-/-</sup> Tumor.** (A) Schematic representation of syngeneic tumor model; WT and *Irf1*<sup>-/-</sup> YUMM2.1 tumor cells were used to subcutaneously inject into WT mice and tumor growth was monitored as depicted. (B) Highlights the greater infiltration of NK cells relative to CD4<sup>+</sup>, CD8<sup>+</sup> and NKT cells in the *Irf1*<sup>-/-</sup> YUMM2.1 tumors from WT mice. Upper and lower panels represent indicated immune cells “per gram of tumors” and “percentage of CD45<sup>+</sup> cells” respectively. (C) Immunofluorescence staining of YUMM2.1 tumors showing increased infiltration of CD8<sup>+</sup> and CD4<sup>+</sup> cells at the tumor-center and tumor-microenvironment boundary. (D) Shows low level of surface MHC-I expression in YUMM2.1 as compared to MC38, which is induced by IFN- $\gamma$  (100 units/ml, 18h). (E) Left histograms show surface expression of MHC-I at baseline and after stimulation with IFN- $\gamma$  (100 units/ml for 18h) in WT and *Irf1*<sup>-/-</sup> tumor cell clones (MC38 and YUMM2.1). Right bar graph represents the average expression of MHC-I (MFI) in WT and *Irf1*<sup>-/-</sup> tumor cells to highlight diminished level of MHC-I expression in the *Irf1*<sup>-/-</sup> YUMM2.1 cell as compared to MC38. For B, P values were determined by a Mann-Whitney U/Wilcoxon rank-sum test. \* for P  $\leq$  0.05; \*\* for P < 0.01; \*\*\* for P < 0.001; \*\*\*\* for P < 0.0001.

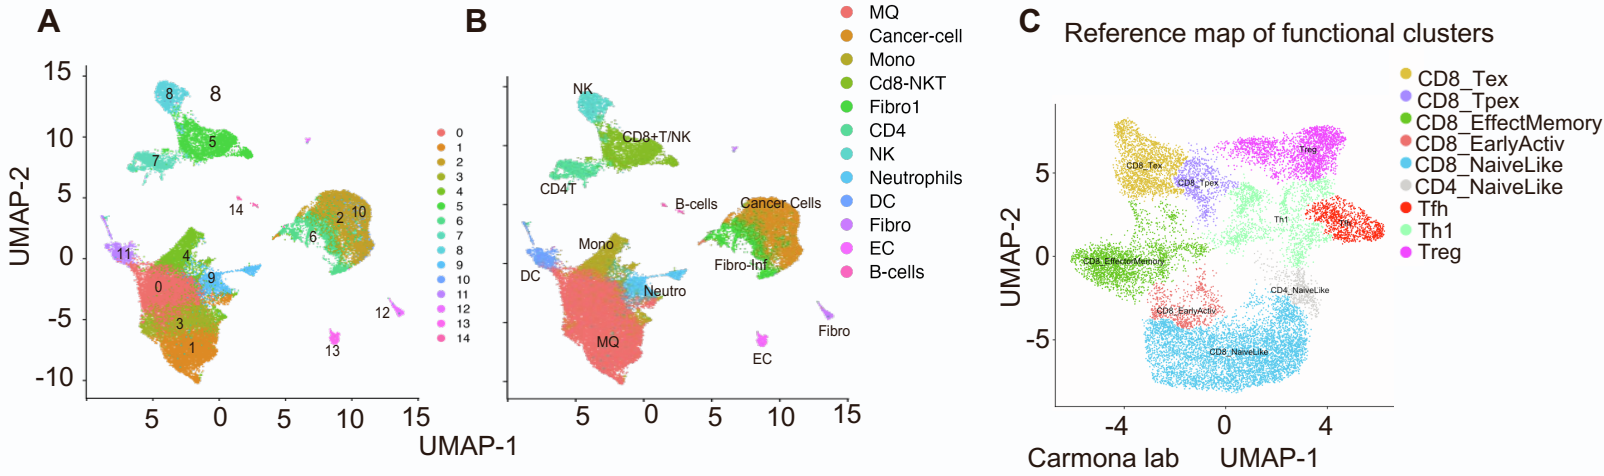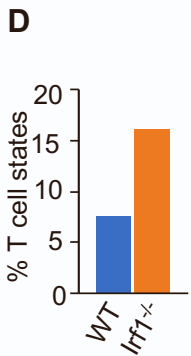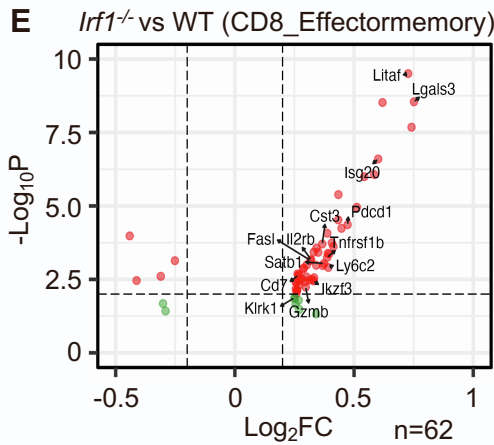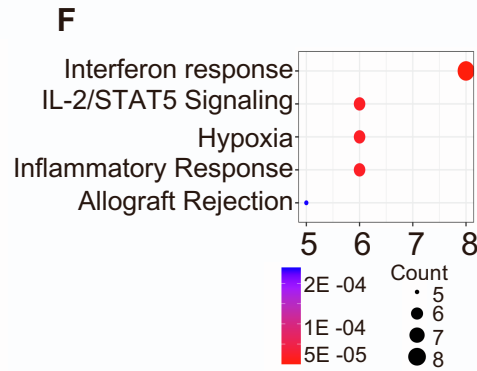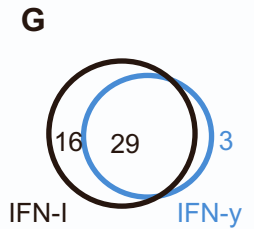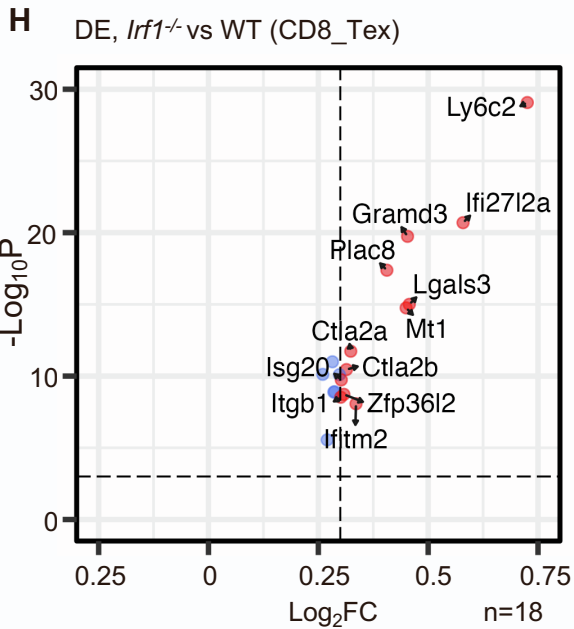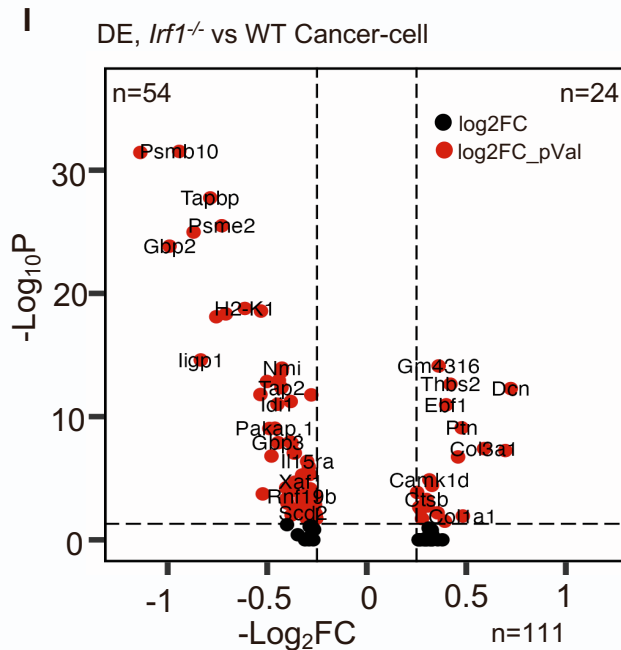

**J** GO, upregulated genes in Cancer-cells

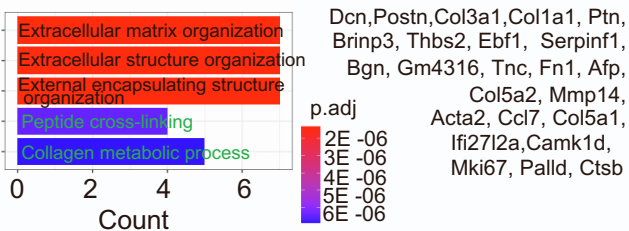

GO, down regulated genes in Cancer-cells

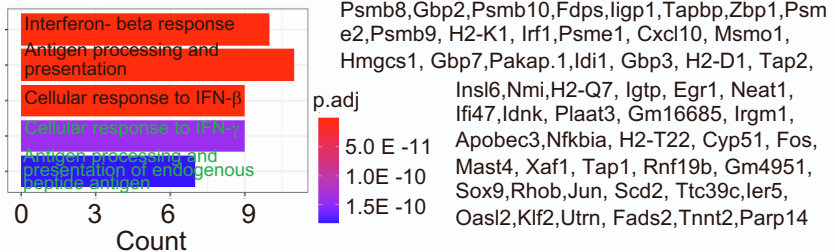

**Figure S3. (Related to Figure 3)** (A) UMAP showing 15 distinct conserved clusters of cells identified by integrated Seurat analysis of scRNA-seq of WT and *Irf1*<sup>-/-</sup> MC38 tumors. (B) Based on the expression of cell type specific marker genes, these 15 clusters are reduced to indicated 12 cell types. (C) A reference T cell atlas from ProjectTILs showing 9 distinct T cell states that is used as reference to project sc-RNA-seq data from WT and *Irf1*<sup>-/-</sup> tumors in Fig 2D. (D) More than double proportion of T cells are mapped to reference from *Irf1*<sup>-/-</sup> tumors as compared to that of the WT tumors. (E) Differentially expressed (DE) genes in CD8\_effectormemory cells, reveals induced expression of ISGs in cells from *Irf1*<sup>-/-</sup> tumors. (F) Gene ontology analysis MSigDB Hallmark 2020 gene sets in Enrichr indicates that interferon and IL2/ STAT5 signaling pathway genes are over expressed in CD8\_effectormemory like cells from *Irf1*<sup>-/-</sup> as compared to WT tumors. (G) Interferome data base (<http://www.interferome.org>) indicated 48 out of 56 genes that are over expressed in CD8\_effectormemory like cells from *Irf1*<sup>-/-</sup> tumors are ISGs and majority of type-I IFN inducible (45 out of 48) as compared to IFN- $\gamma$  inducible (32 out of 48). (H) DE genes in CD8\_Tex cells indicating elevated expression of the ISGs (*Isg20*, *Ifitm2*) and T cell activation marker genes (*Ly6C2*). (I) Volcano plot showing reduced expression of some of the ISGs in differentially expressed genes between *Irf1*<sup>-/-</sup> and WT cancer cell clusters. (J) Bar graph, left panel shows overrepresented pathways in genes that are upregulated in *Irf1*<sup>-/-</sup> cancer cells cluster. right panel shows pathways overrepresented in genes that are down regulated in *Irf1*<sup>-/-</sup> cancer cells cluster, which includes interferon response pathways.

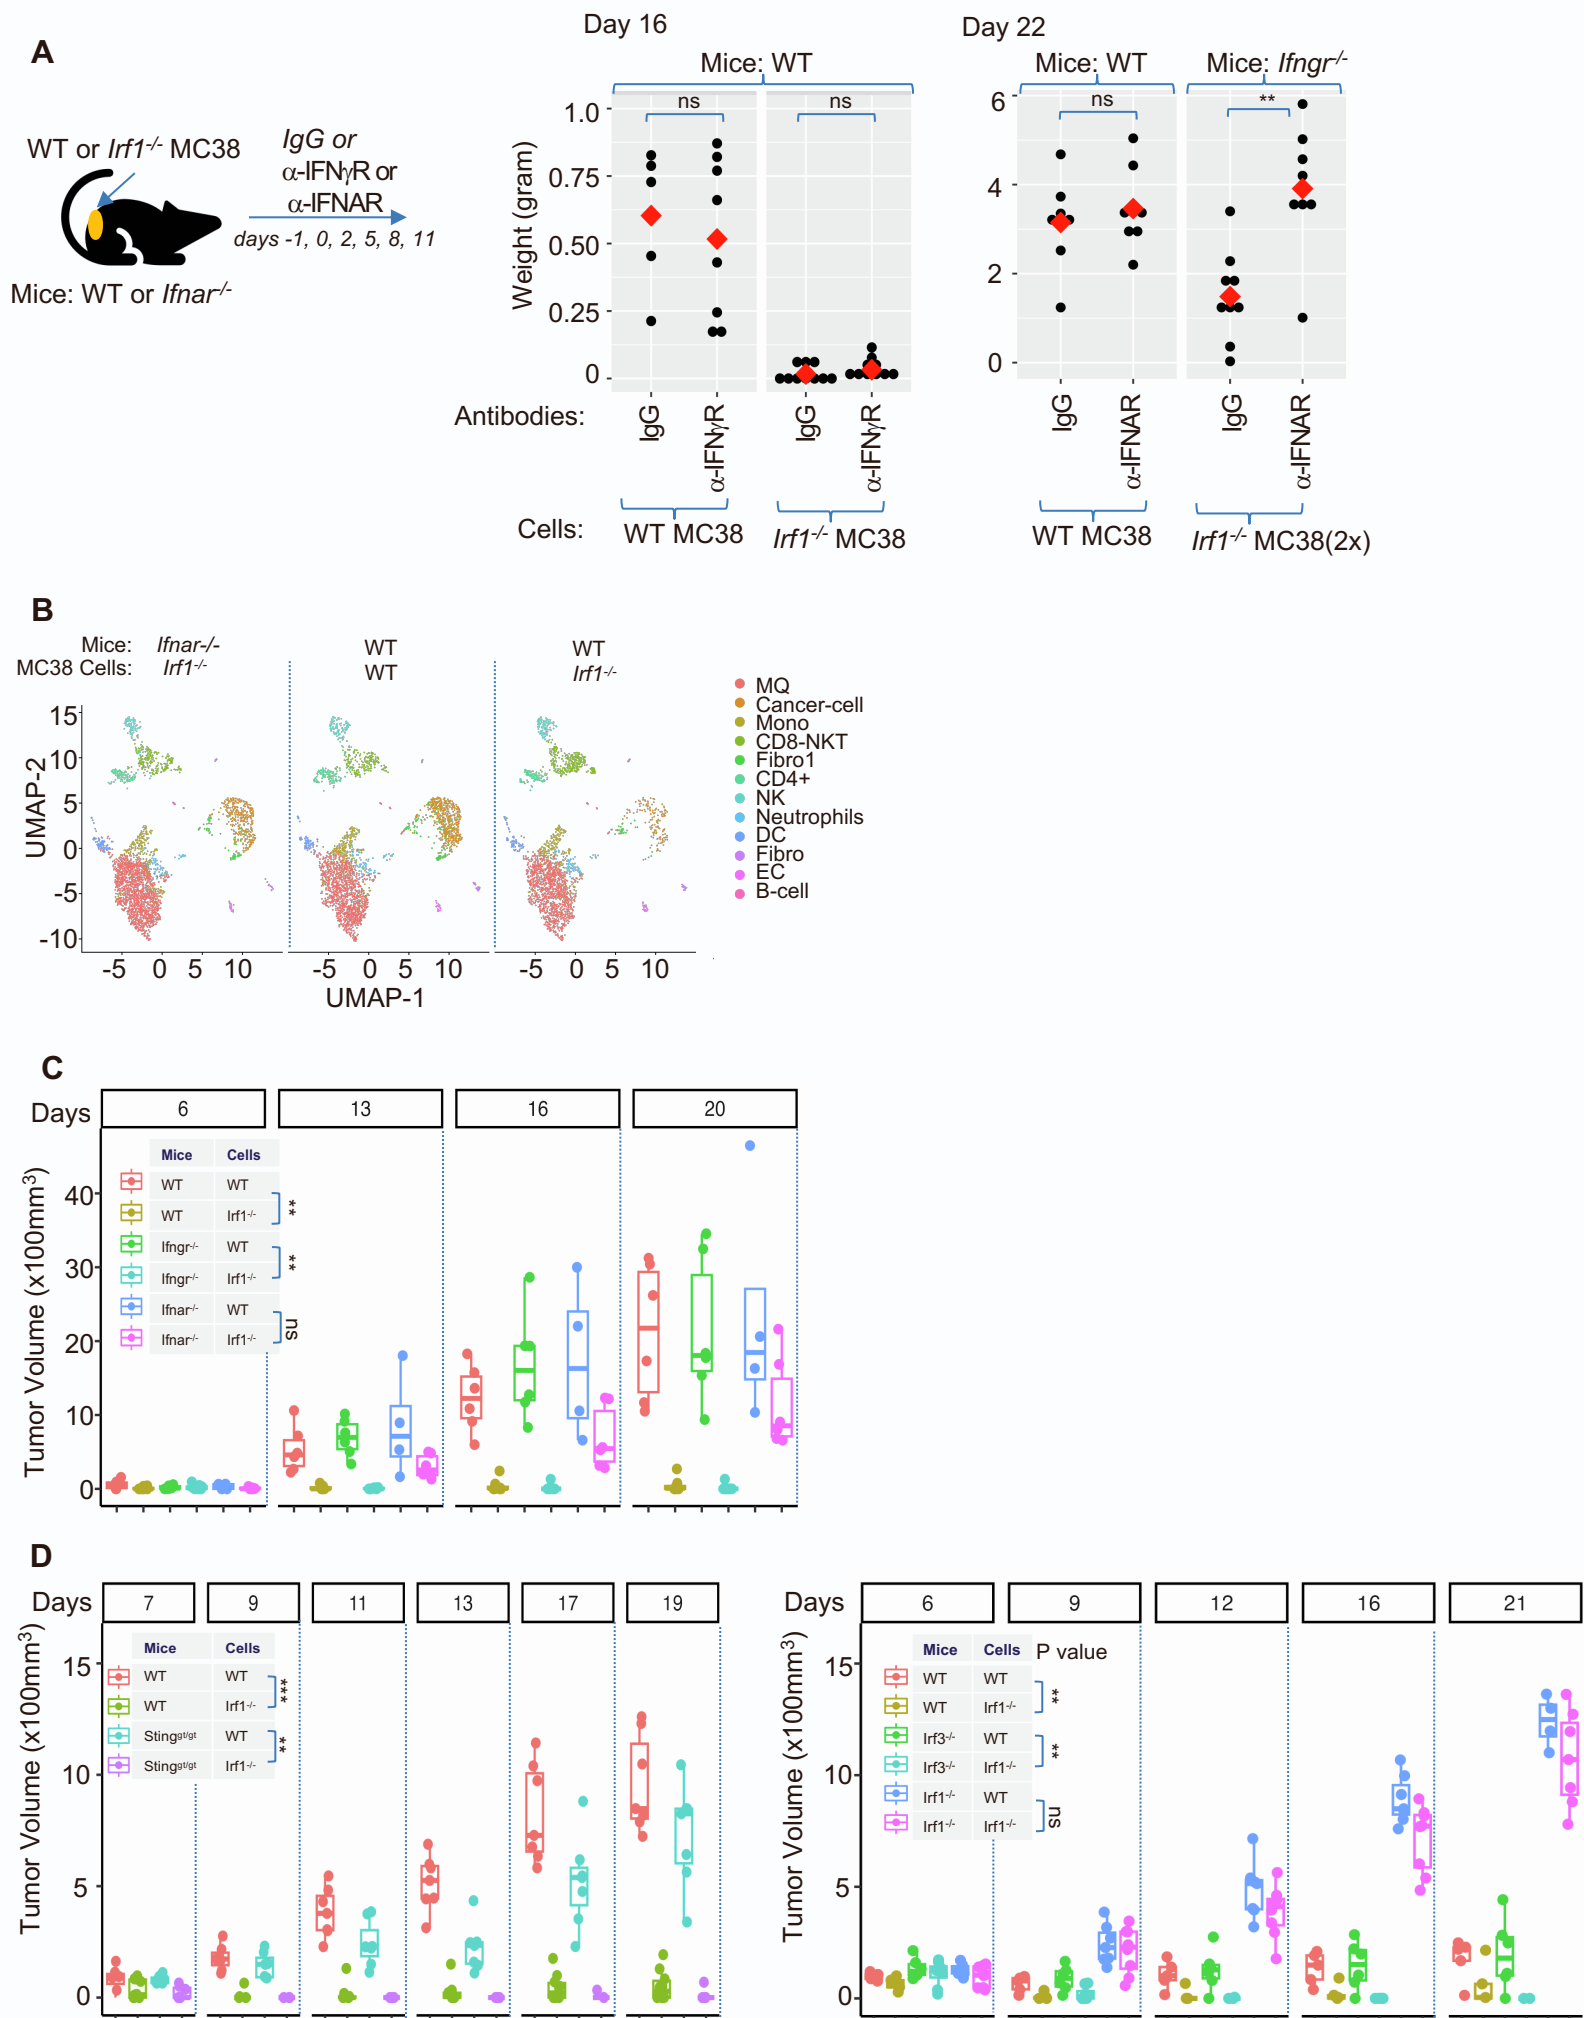



**Figure S4. (Related to Figure 4) Host's IFN-I Signaling Primarily Suppresses *Irf1*<sup>-/-</sup> Tumor Growth and Contributes to Effector T Cell Like Population in the *Irf1*<sup>-/-</sup> Tumors. (A)** Schematic representation of strategies to test the roles of type I IFN and IFN $\gamma$  in the control of WT and *Irf1*<sup>-/-</sup> tumors. Middle dot plot shows that blockade of IFNGR does not impact WT and *Irf1*<sup>-/-</sup> tumors. Right dot plot represents that blockade of IFNAR greatly enhance the *Irf1*<sup>-/-</sup> tumor growth in *Ifngr*<sup>-/-</sup> mice. **(B)** Uniform Manifold Approximation and Projection (UMAP) of single cell RNA-seq data from "*Irf1*<sup>-/-</sup> MC38 tumors grown in *Ifnar*<sup>-/-</sup> mice", "WT MC38 tumors grown in WT mice" and "*Irf1*<sup>-/-</sup> MC38 tumors grown in WT mice", related to Fig 4B. **(C)** Related to Figure 4A, dot plot represents volume of WT and *Irf1*<sup>-/-</sup> MC38 tumors in WT, *Ifngr*<sup>-/-</sup>, and *Ifnar*<sup>-/-</sup> mice on on indicated days post cell injection **(D)** Related to Figure 4G, Middle plot shows volume of WT and *Irf1*<sup>-/-</sup> MC38 tumor in WT and *Sting*<sup>tg/tg</sup> mice and right plot shows volume of WT and *Irf1*<sup>-/-</sup> tumors in the WT, *Irf3*<sup>-/-</sup> and *Irf1*<sup>-/-</sup> mice on indicated days post cells injection. For plots in A, C and D, P values were determined by a Mann-Whitney U/ Wilcoxon rank-sum test. \* for P  $\leq$  0.05; \*\* for P < 0.01; \*\*\* for P < 0.001; \*\*\*\* for P < 0.0001.

**A** Tumor infiltrating T cells populations (WT vs *Irf1*<sup>-/-</sup> mice)

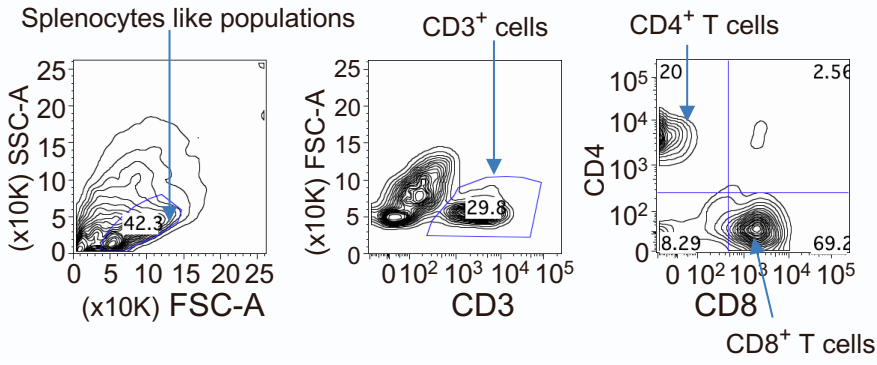

**B** Tumor infiltrating NK and NKT cells populations (WT vs *Irf1*<sup>-/-</sup> mice)

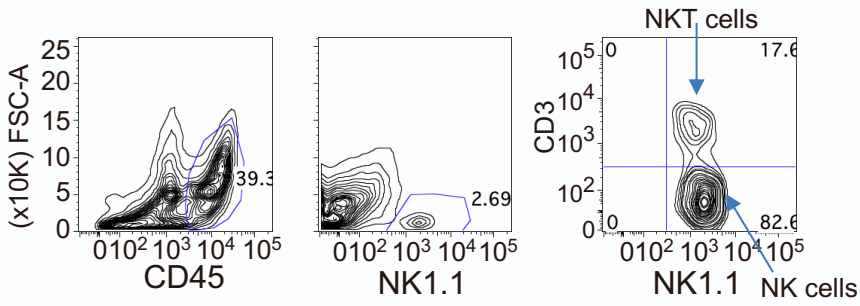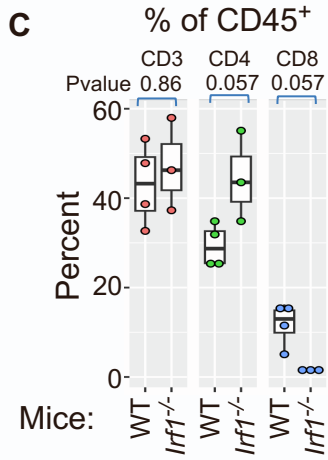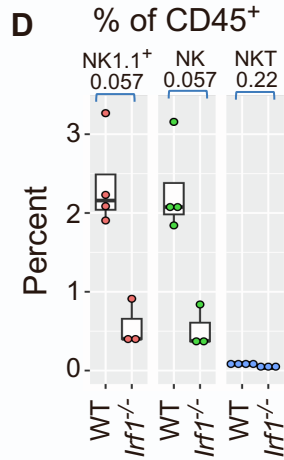

**Figure S5 (Related to Figure 5).** Gating scheme to profile tumor infiltrated T cell sub populations **(A)**, and NK and NKT cells populations **(B)**. **(C)** Frequency of total T “CD3<sup>+</sup>”, helper T “CD4<sup>+</sup>” and cytotoxic T “CD8<sup>+</sup>” cells relative to CD45<sup>+</sup> cells in the spleen of WT (n=4) and *Irf1*<sup>-/-</sup> mice (n=3). Mean frequencies for CD3, CD4<sup>+</sup> T and CD8<sup>+</sup> T cells in WT spleen are 43.2 %, 29.36% and 11.8%, respectively. Mean frequencies for CD3, CD4<sup>+</sup> T and CD8<sup>+</sup> T cells in *Irf1*<sup>-/-</sup> spleen are 47.1 %, 44.5% and 1.6%, respectively. **(D)** Frequency of “total NK1.1”, “NK” and “NKT” cells relative to CD45<sup>+</sup> cells in the spleen of WT (n=4) and *Irf1*<sup>-/-</sup> (n=3) mice. Mean frequencies of NK1.1+, NK and NKT cells in WT spleen are 2.4 %, 0.084% and 2.28%, respectively. Mean frequencies of NK1.1+, NK and NKT cells in *Irf1*<sup>-/-</sup> spleen are 0.6 %, 0.043% and 0.52%, respectively.

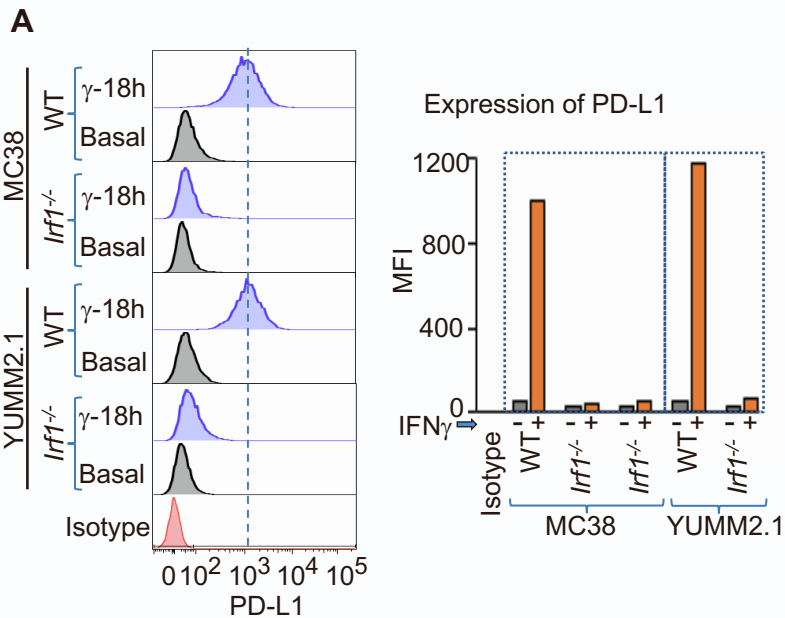

**B**

Basal gene expression change *Irf1*<sup>-/-</sup> cells  
 RPKM>1; FC=3, P<0.05, n=71

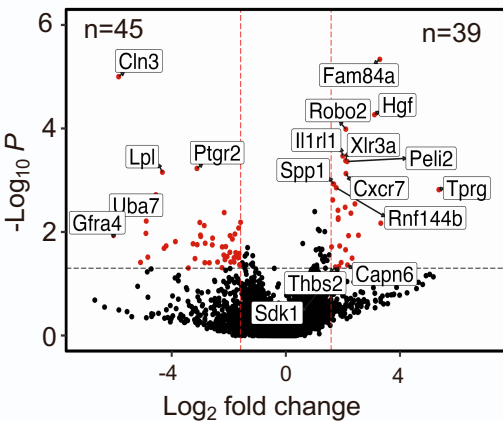

**C** GO term for Basal downregulated genes in IRF1KO

| Term                                                             | P-value    | Genes                  |
|------------------------------------------------------------------|------------|------------------------|
| MHC1 Causes Antigen Presentation Failure in Cancer Immune Escape | 2.73E-07   | TAP2;PSMB8;PSMB9;TAPBP |
| Proteins with Altered Expression in Cancer Immune Escape         | 4.05E-06   | TAP2;PSMB8;PSMB9;TAPBP |
| MHC1-Mediated Antigen Presentation                               | 2.20E-04   | TAP2;TAPBP             |
| Genes with Mutations in Cancer Immune Escape                     | 2.69E-04   | TAP2;TAPBP             |
| Endogenous Peptide Antigen Presentation                          | 0.01342584 | TAPBP                  |
| Estrogen Deficiency in Female Obesity                            | 0.02007253 | LPL                    |
| Familial Partial Lipodystrophy Type 3 Progression (Hypothesis)   | 0.02227835 | LPL                    |
| Proteins with Altered Expression in Atopic Dermatitis            | 0.02447932 | CDSN                   |
| IL15R -> NF-kB/NFATC Signaling                                   | 0.02447932 | IL15RA                 |
| IL15R -> STAT Signaling                                          | 0.02447932 | IL15RA                 |

**D** GO term for Basal upregulated genes in IRF1KO

| Term                              | P-value    | Genes                             |
|-----------------------------------|------------|-----------------------------------|
| Epithelial Mesenchymal Transition | 2.30E-06   | TGFBR3;COL3A1;LOX;MMP3;SPP1;THBS2 |
| Angiogenesis                      | 0.00223848 | COL3A1;SPP1                       |
| Inflammatory Response             | 0.00690907 | PTGER4;RNF144B;OSMR               |
| UV Response Dn                    | 0.03206304 | TGFBR3;COL3A1                     |
| Apoptosis                         | 0.0392922  | TGFBR3;HGF                        |
| IL-2/STAT5 Signaling              | 0.05740551 | IL1RL1;SPP1                       |
| Hypoxia                           | 0.05791557 | LOX;PPP1R3C                       |
| Myogenesis                        | 0.05791557 | COL3A1;PPP1R3C                    |
| IL-6/JAK/STAT3 Signaling          | 0.15648845 | OSMR                              |
| Spermatogenesis                   | 0.23232899 | IL13RA2                           |

**E**

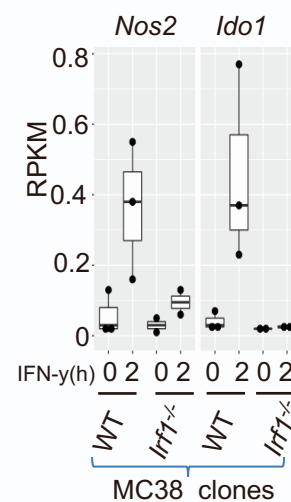

**Figure S6. (Related to Figure 6) IFN- $\gamma$  Inducible but not the Basal Expression of PD-L1 is Dependent on IRF1.** (A) In left, histogram shows comparable basal expression of PD-L1 on MC38 and YUMM2.1 cell lines and also highlights absolute dependence of IFN- $\gamma$  induced PD-L1 expression on IRF1 in MC38 as well as in YUMM2.1 cells. Right bar graph summarizes the MFI of PD-L1 expression in WT and *Irf1*<sup>-/-</sup> cell clones. (B) Volcano plot of all the expressed genes (at basal level) showing DE genes between WT and *Irf1*<sup>-/-</sup> MC38 cells. This identified 45 downregulated (top left quadrant) and 39 upregulated (top right quadrant) genes in *Irf1*<sup>-/-</sup> cells relative to WT cells. (C) Gene Ontology analysis of genes with reduced basal expression in *Irf1*<sup>-/-</sup> cells reveals enrichment of pathways required for MHC-I mediated antigen presentation. (D) Gene Ontology analysis of genes with enhanced basal expression in *Irf1*<sup>-/-</sup> cells, which are overrepresented in epithelial to mesenchymal transition pathway. (E) RPKM expression of *Nos2* and *Ido1* in WT and *Irf1*<sup>-/-</sup> cells, which shows strong dependence of both genes on IRF1 during IFN- $\gamma$  signaling.

**A** Determining ChIP-seq Peak Score Cutoffs for IRF1 and STAT1 Binding to Target Sites.

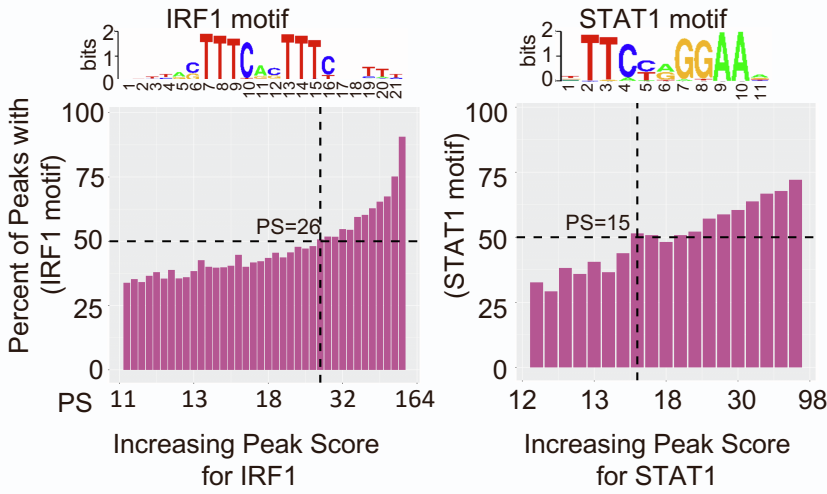

**B**

Distribution of ChIP-Seq Peaks (upon 2 h IFN- $\gamma$  Stimulation)

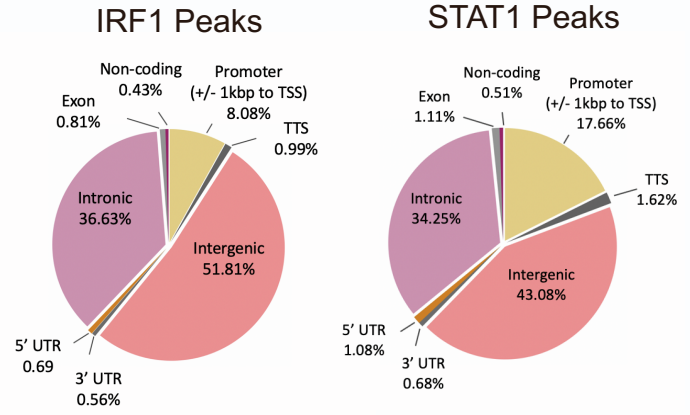

**C**

IRF1 and STAT1 binding at the key genes positively regulated by IRF1

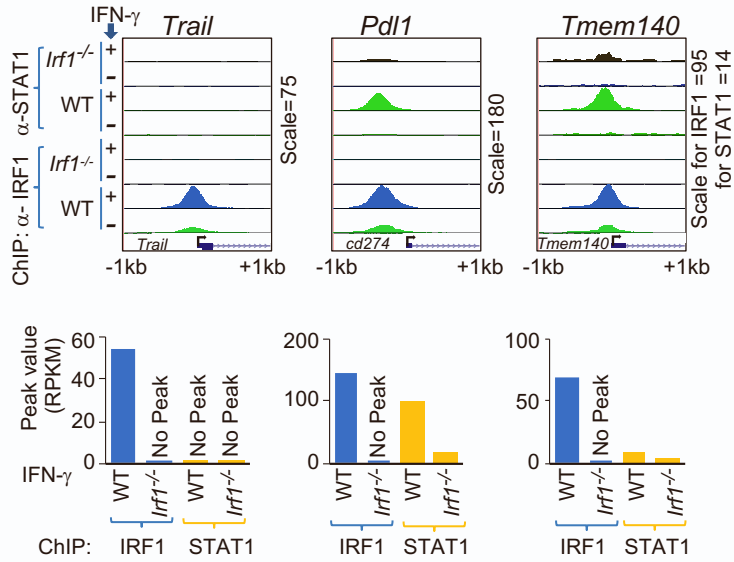

**E**

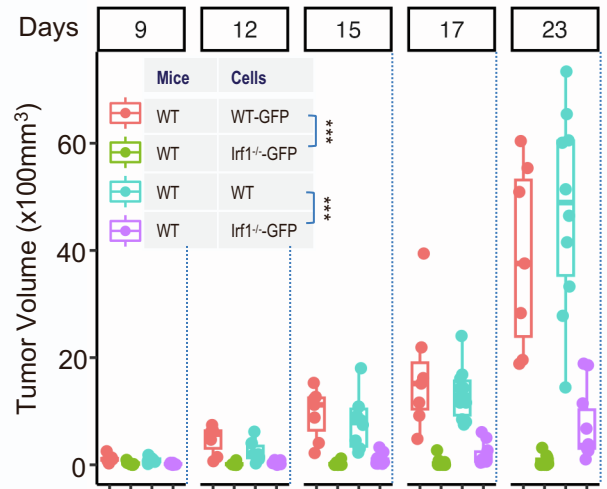

**D**

IRF1 and STAT1 binding at the key genes negatively regulated by IRF1

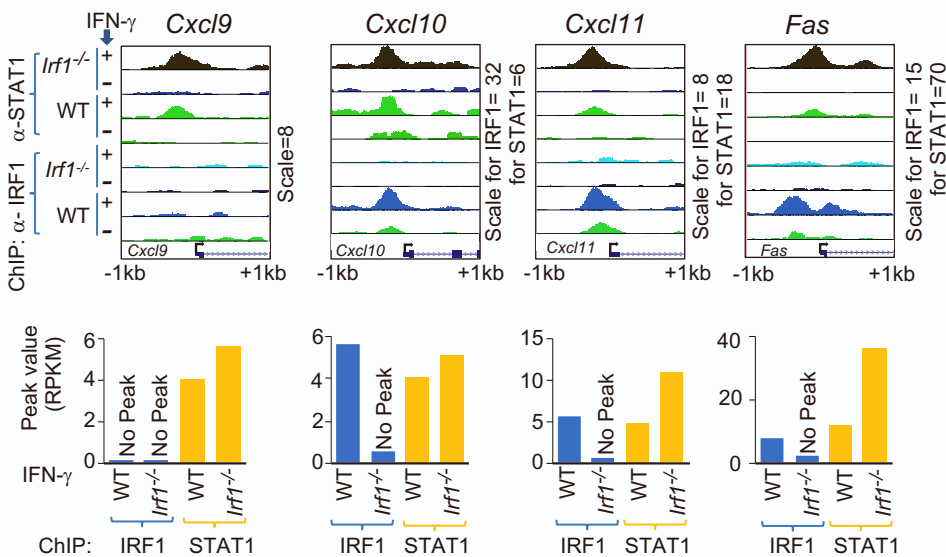

**Figure S7. (Related to Figure 7) Detailed Quantitative Analysis of ChIP-seq Peaks Reveals Distinct Mode of IRF1 and STAT1 Binding to Regulate their Target Genes Expression. (A)** X-axis shows increasing ChIP-seq peak score separated into 38 (left panel) and 19 (right panel) bins for IRF1 and STAT1 called peaks respectively and Y axis shows percentage of peaks with consensus motifs. The dotted lines on plots shows selection of bins with 50% of their called peaks with a recognizable motif. **(B)** Pie charts showing distribution of IRF1 (left) and STAT1 (right) peaks in various genomic locations in IFN- $\gamma$  stimulated cells. **(C)** Upper panel displays genome browser tracks for the binding of IRF1 and STAT1 within 1kb of the TSSs of genes positively regulated by IRF1, in unstimulated and IFN- $\gamma$  stimulated, WT and *Irf1*<sup>-/-</sup> MC38 cells. Lower panel shows the quantitative values of the peaks shown in the upper panels. This highlights that IRF1 dictates expression of these genes as loss of its binding in *Irf1*<sup>-/-</sup> also diminishes STAT1 binding at the promoters where IRF1 co binds along with STAT1 (*Pdl1* and *Tmem140*). **(D)** Upper panel displays genome browser tracks for the binding of IRF1 and STAT1 within 1kb of the TSSs of genes either not regulated or negatively regulated by IRF1, in unstimulated and IFN- $\gamma$  stimulated, WT and *Irf1*<sup>-/-</sup> MC38 cells. Lower panel shows the quantitative values of the peaks shown in the upper panels. This highlights that in IFN- $\gamma$  stimulated *Irf1*<sup>-/-</sup> cells, STAT1 binds comparably or strongly to the genes that are either independent or are influenced negatively by IRF1(*Cxcl9-11*, and *Fas*). **(E)** Related to Fig 7I, plot showing volume of tumors on indicated days in WT hosts that were injected with GFP or PD-L1 over-expressing WT and *Irf1*<sup>-/-</sup> MC38 cells. For E, P values were determined by a Mann-Whitney U/ Wilcoxon rank-sum test. \* for P  $\leq$  0.05; \*\* for P < 0.01; \*\*\* for P < 0.001; \*\*\*\* for P < 0.0001.
